# Supplementary material
Source: PubMed Central journal article supplement (PMC8728689)
Supplement: NIHMS1009180-supplement-Supplements.pdf [file NIHMS1009180-supplement-Supplements.pdf]

*Supplementary Table S1: List of some of the down-regulated genes in WNIN-Ob rat retina*

| <b>Symbol</b>        | <b>Description</b>                                                           | <b>Genbank</b>            | <b>Fold Change</b> |
|----------------------|------------------------------------------------------------------------------|---------------------------|--------------------|
| Grk1                 | G protein-coupled receptor kinase 1                                          | <a href="#">NM_031096</a> | 17.87              |
| Dp111_predicted      | deleted in polyposis 1-like 1 (predicted)                                    | <a href="#">AI070350</a>  | 15.67              |
| Slc24a1              | solute carrier family 24 (sodium/potassium/calcium exchanger), member 1      | <a href="#">NM_020090</a> | 13.73              |
| Gnb1                 | guanine nucleotide binding protein, beta 1                                   | <a href="#">AI230669</a>  | 13.54              |
| Hk2                  | hexokinase 2                                                                 | <a href="#">BI294137</a>  | 13.36              |
| Kcnj14               | potassium inwardly-rectifying channel, subfamily J, member 14                | <a href="#">AI717104</a>  | 13.36              |
| RGD1308116_predicted | similar to hypothetical protein MGC42105 (predicted)                         | <a href="#">BG375383</a>  | 12.29              |
| Pde6a_predicted      | phosphodiesterase 6A, cGMP-specific, rod, alpha (predicted)                  | <a href="#">BG374465</a>  | 12.21              |
| Ppap2c               | phosphatidic acid phosphatase type 2c                                        | <a href="#">AA893191</a>  | 10.79              |
| Rp1_predicted        | retinitis pigmentosa 1 (autosomal dominant) (predicted)                      | <a href="#">AI577591</a>  | 10.4               |
| Orc4l                | origin recognition complex, subunit 4-like ( <i>S. cerevisiae</i> )          | <a href="#">AI070558</a>  | 9.91               |
| Wwp2_predicted       | WW domain containing E3 ubiquitin protein ligase 2 (predicted)               | <a href="#">BG375500</a>  | 9.84               |
| Mrc2_predicted       | mannose receptor, C type 2 (predicted)                                       | <a href="#">BF289229</a>  | 9.31               |
| Agpat3_predicted     | 1-acylglycerol-3-phosphate O-acyltransferase 3 (predicted)                   | <a href="#">BI290161</a>  | 9.12               |
| Pax4                 | paired box gene 4                                                            | <a href="#">AF053102</a>  | 8.81               |
| Dyrk2_predicted      | dual-specificity tyrosine-(Y)-phosphorylation regulated kinase 2 (predicted) | <a href="#">BM388710</a>  | 8.28               |
| Polg2_predicted      | polymerase (DNA directed), gamma 2, accessory subunit (predicted)            | <a href="#">BM390747</a>  | 8.16               |
| Hmmr                 | hyaluronan mediated motility receptor                                        | <a href="#">AI171185</a>  | 8.11               |
| Arf4l_predicted      | ADP-ribosylation factor 4-like (predicted)                                   | <a href="#">AI030650</a>  | 8.05               |
| Faim                 | Fas apoptotic inhibitory molecule                                            | <a href="#">NM_080895</a> | 7.78               |
| Hmmr                 | hyaluronan mediated motility receptor                                        | <a href="#">AF336825</a>  | 7.72               |
| Cngb1                | cyclic nucleotide gated channel beta 1                                       | <a href="#">AF068572</a>  | 7.72               |
| Nt5                  | 5 nucleotidase                                                               | <a href="#">BI289470</a>  | 7.67               |
| Cnga1                | cyclic nucleotide-gated cation channel                                       | <a href="#">NM_053497</a> | 7.62               |
| Icmt                 | isoprenylcysteine carboxyl                                                   | <a href="#">BI293227</a>  | 7.56               |

|                      |                                                                                                |                           |      |
|----------------------|------------------------------------------------------------------------------------------------|---------------------------|------|
|                      | methyltransferase                                                                              |                           |      |
| Fscn2_predicted      | fascin homolog 2, actin-bundling protein, retinal (Strongylocentrotus purpuratus) (predicted)  | <a href="#">AI717493</a>  | 7.26 |
| Agpat3_predicted     | 1-acylglycerol-3-phosphate O-acyltransferase 3 (predicted)                                     | <a href="#">AW533203</a>  | 7.21 |
| Dp111_predicted      | deleted in polyposis 1-like 1 (predicted)                                                      | <a href="#">BG376982</a>  | 7.06 |
| Aqp1                 | aquaporin 1                                                                                    | <a href="#">AA891661</a>  | 7.01 |
| RGD:1359702          | solute carrier family 25, member 30                                                            | <a href="#">BG378609</a>  | 6.82 |
| Cngb1                | cyclic nucleotide gated channel beta 1                                                         | <a href="#">AJ224680</a>  | 6.82 |
| RGD1310383_predicted | similar to T-cell activation protein phosphatase 2C (predicted)                                | <a href="#">BE096680</a>  | 6.82 |
| RGD1306344_predicted | similar to Ab1-133 (predicted)                                                                 | <a href="#">AI073208</a>  | 6.77 |
| Susd3_predicted      | sushi domain containing 3 (predicted)                                                          | <a href="#">AI407337</a>  | 6.68 |
| Crx                  | cone-rod homeobox protein                                                                      | <a href="#">NM_021855</a> | 6.54 |
| Cds1                 | CDP-diacylglycerol synthase 1                                                                  | <a href="#">NM_031242</a> | 6.49 |
| Rtbnd_predicted      | retbindin (predicted)                                                                          | <a href="#">AI763817</a>  | 6.45 |
| Kcnb1                | potassium voltage gated channel, Shab-related subfamily, member 1                              | <a href="#">NM_013186</a> | 6.32 |
| RGD1307393_predicted | similar to hypothetical protein MGC9907 (predicted)                                            | <a href="#">AI171174</a>  | 6.23 |
| Galnt7               | UDP-N-acetyl-alpha-D-galactosamine:polypeptide N-acetylgalactosaminyltransferase 7 (GalNAc-T7) | <a href="#">AI716589</a>  | 6.14 |
| Pde6b_predicted      | phosphodiesterase 6B, cGMP, rod receptor, beta polypeptide (predicted)                         | <a href="#">AI575628</a>  | 6.10 |
| Zbtb8_predicted      | zinc finger and BTB domain containing 8 (predicted)                                            | <a href="#">AA963583</a>  | 6.06 |
| Txnl6_predicted      | thioredoxin-like 6 (predicted)                                                                 | <a href="#">BE108041</a>  | 6.02 |
| Ric8b                | resistance to inhibitors of cholinesterase 8B (C. elegans)                                     | <a href="#">AI009591</a>  | 5.97 |
| Abca4_predicted      | ATP-binding cassette, sub-family A (ABC1), member 4 (predicted)                                | <a href="#">AI602131</a>  | 5.97 |
| Als2cr4_predicted    | amyotrophic lateral sclerosis 2 (juvenile) chromosome region, candidate 4 (predicted)          | <a href="#">BG378932</a>  | 5.85 |
| Zdhhc2               | zinc finger, DHHC domain containing 2                                                          | <a href="#">AF228917</a>  | 5.85 |
| Rdh11_predicted      | retinol dehydrogenase 11 (predicted)                                                           | <a href="#">BG374035</a>  | 5.77 |
| Nt5                  | 5 nucleotidase                                                                                 | <a href="#">NM_0215</a>   | 5.61 |

|                      |                                                                                                               |                           |      |
|----------------------|---------------------------------------------------------------------------------------------------------------|---------------------------|------|
|                      |                                                                                                               | <a href="#">76</a>        |      |
| Csda                 | cold shock domain protein A                                                                                   | <a href="#">AA866458</a>  | 5.54 |
| Slc31a2_predicted    | solute carrier family 31, member 2 (predicted)                                                                | <a href="#">BF417391</a>  | 5.54 |
| Rbp3                 | retinol binding protein 3, interstitial                                                                       | <a href="#">AI575415</a>  | 5.46 |
| Rgs9                 | regulator of G-protein signaling 9                                                                            | <a href="#">AI070376</a>  | 5.42 |
| RGD1306344_predicted | similar to Ab1-133 (predicted)                                                                                | <a href="#">BE097728</a>  | 5.42 |
| Rabgef1_predicted    | RAB guanine nucleotide exchange factor (GEF) 1 (predicted)                                                    | <a href="#">AI575052</a>  | 5.42 |
| Tdrd7                | tudor domain containing 7                                                                                     | <a href="#">AB030644</a>  | 5.31 |
| Gtf2f2               | general transcription factor IIF, polypeptide 2                                                               | <a href="#">NM_031042</a> | 5.31 |
| Smarcd1_predicted    | SWI/SNF related, matrix associated, actin dependent regulator of chromatin, subfamily d, member 1 (predicted) | <a href="#">BG380270</a>  | 5.27 |
| Pter                 | phosphotriesterase related                                                                                    | <a href="#">AW523562</a>  | 5.09 |
| Rcvrn                | recoverin                                                                                                     | <a href="#">NM_080901</a> | 5.09 |
| RGD1310578_predicted | similar to cerebellar degeneration-related 2 (predicted)                                                      | <a href="#">BG671589</a>  | 5.09 |
| Slc31a2_predicted    | solute carrier family 31, member 2 (predicted)                                                                | <a href="#">BE101666</a>  | 5.06 |
| Map1b                | microtubule-associated protein 1b                                                                             | <a href="#">BG672052</a>  | 5.02 |
| RGD1306592_predicted | similar to Agrin (predicted)                                                                                  | <a href="#">AI144872</a>  | 4.99 |
| Impg2                | interphotoreceptor matrix proteoglycan 2                                                                      | <a href="#">U76717</a>    | 4.85 |
| Optn                 | optineurin                                                                                                    | <a href="#">BI294994</a>  | 4.78 |
| Impg1                | interphotoreceptor matrix proteoglycan 1                                                                      | <a href="#">NM_023958</a> | 4.78 |
| Hspa1a               | heat shock 70kD protein 1A                                                                                    | <a href="#">NM_031971</a> | 4.75 |
| Prc1_predicted       | protein regulator of cytokinesis 1 (predicted)                                                                | <a href="#">BI284262</a>  | 4.72 |
| Mhc2ta               | MHC class II transactivator                                                                                   | <a href="#">AI045321</a>  | 4.72 |
| RGD:1303151          | adiponectin receptor 1                                                                                        | <a href="#">BI289063</a>  | 4.69 |
| Aipl1                | aryl hydrocarbon receptor-interacting protein-like 1                                                          | <a href="#">NM_021590</a> | 4.65 |
| Kif20a_predicted     | kinesin family member 20A (predicted)                                                                         | <a href="#">BE100584</a>  | 4.65 |
| Txnl6_predicted      | thioredoxin-like 6 (predicted)                                                                                | <a href="#">BI274269</a>  | 4.62 |
| Cacnb2               | calcium channel, voltage-dependent, beta 2                                                                    | <a href="#">BG37397</a>   | 4.62 |

|                      |                                                                               |                           |      |
|----------------------|-------------------------------------------------------------------------------|---------------------------|------|
|                      | subunit                                                                       | <a href="#">3</a>         |      |
| Rorb_predicted       | RAR-related orphan receptor beta (predicted)                                  | <a href="#">BF386897</a>  | 4.59 |
| Dpysl5               | dihydropyrimidinase-like 5                                                    | <a href="#">BI300588</a>  | 4.59 |
| Gng3                 | guanine nucleotide binding protein (G protein), gamma 3                       | <a href="#">BM390252</a>  | 4.56 |
| Mpdz                 | multiple PDZ domain protein                                                   | <a href="#">NM_019196</a> | 4.53 |
| Tbc1d12_predicted    | TBC1D12: TBC1 domain family, member 12 (predicted)                            | <a href="#">BF389489</a>  | 4.46 |
| B4galt1              | UDP-Gal:betaGlcNAc beta 1,4-galactosyltransferase, polypeptide 1              | <a href="#">BI286141</a>  | 4.46 |
| Mgat1                | Alpha-1,3-mannosyl-glycoprotein 2-beta-N-acetylglucosaminyltransferase        | <a href="#">NM_030861</a> | 4.43 |
| Gnat1_predicted      | guanine nucleotide binding protein, alpha transducing 1 (predicted)           | <a href="#">AI412496</a>  | 4.43 |
| Dusp14_predicted     | dual specificity phosphatase 14 (predicted)                                   | <a href="#">AI236997</a>  | 4.40 |
| Rho                  | rhodopsin                                                                     | <a href="#">AI716022</a>  | 4.40 |
| RGD1308472_predicted | similar to E130103I17Rik protein (predicted)                                  | <a href="#">BE110675</a>  | 4.40 |
| Rhot2                | MIRO2 protein                                                                 | <a href="#">AI233243</a>  | 4.40 |
| RGD1308215_predicted | similar to hypothetical protein DKFZp434I2117 (predicted)                     | <a href="#">BG381537</a>  | 4.40 |
| Tead3_predicted      | TEA domain family member 3 (predicted)                                        | <a href="#">BG372018</a>  | 4.40 |
| Slco4a1              | solute carrier organic anion transporter family, member 4a1                   | <a href="#">AI180349</a>  | 4.40 |
| Herc3_predicted      | hect domain and RLD 3 (predicted)                                             | <a href="#">BI295026</a>  | 4.31 |
| Bbs7_predicted       | Bardet-Biedl syndrome 7 (predicted)                                           | <a href="#">AI170730</a>  | 4.31 |
| Bbs5_predicted       | Bardet-Biedl syndrome 5 (predicted)                                           | <a href="#">BE105572</a>  | 4.31 |
| Stk22s1              | serine/threonine kinase 22 substrate 1                                        | <a href="#">AI717642</a>  | 4.28 |
| Sellh                | Sell (suppressor of lin-12) 1 homolog (C. elegans)                            | <a href="#">BM391570</a>  | 4.28 |
| Rom1_predicted       | rod outer segment membrane protein 1 (predicted)                              | <a href="#">AA892855</a>  | 4.28 |
| Pcdh21               | MT-protocadherin                                                              | <a href="#">NM_053572</a> | 4.25 |
| Rpl31                | ribosomal protein L31                                                         | <a href="#">AA818474</a>  | 4.25 |
| Acadm                | acetyl-Coenzyme A dehydrogenase, medium chain                                 | <a href="#">NM_016986</a> | 4.25 |
| Slc1a2               | solute carrier family 1 (glial high affinity glutamate transporter), member 2 | <a href="#">NM_017215</a> | 4.25 |
| Eml1_predicted       | echinoderm microtubule associated protein                                     | <a href="#">BI289762</a>  | 4.25 |

|                      |                                                                                         |                           |      |
|----------------------|-----------------------------------------------------------------------------------------|---------------------------|------|
|                      | like 1 (predicted)                                                                      |                           |      |
| Osbp2_predicted      | oxysterol binding protein 2 (predicted)                                                 | <a href="#">AW534345</a>  | 4.22 |
| Plekhf2_predicted    | pleckstrin homology domain containing, family F (with FYVE domain) member 2 (predicted) | <a href="#">AI103367</a>  | 4.22 |
| Ptp4a3_predicted     | protein tyrosine phosphatase 4a3 (predicted)                                            | <a href="#">AI104546</a>  | 4.16 |
| RGD1311320_predicted | similar to MGC31683 protein (predicted)                                                 | <a href="#">BF565034</a>  | 4.16 |
| Slc4a7               | solute carrier family 4, sodium bicarbonate cotransporter, member 7                     | <a href="#">AF070475</a>  | 4.16 |
| Hcn1                 | hyperpolarization-activated cyclic nucleotide-gated potassium channel 1                 | <a href="#">NM_053375</a> | 4.14 |
| Tyki_predicted       | thymidylate kinase family LPS-inducible member (predicted)                              | <a href="#">BF282370</a>  | 4.11 |
| Myh6                 | myosin heavy chain, polypeptide 6                                                       | <a href="#">NM_017239</a> | 4.11 |
| Cerk_predicted       | ceramide kinase (predicted)                                                             | <a href="#">AW525194</a>  | 4.08 |
| Podxl                | podocalyxin-like                                                                        | <a href="#">AF109393</a>  | 4.08 |
| Ptpn21               | protein tyrosine phosphatase 2E                                                         | <a href="#">NM_133545</a> | 4.08 |
| Raly_predicted       | hnRNP-associated with lethal yellow (predicted)                                         | <a href="#">BM389226</a>  | 4.05 |
| RGD:1359241          | similar to dJ862K6.2.2 (splicing factor, arginine/serine-rich 6 (SRP55-2)(isoform 2))   | <a href="#">AI177866</a>  | 4.02 |
| Grtp1_predicted      | GH regulated TBC protein 1 (predicted)                                                  | <a href="#">BE099056</a>  | 4.02 |
| Hspa1a               | heat shock 70kD protein 1A                                                              | <a href="#">BI278231</a>  | 4.00 |
| Gucal1a_predicted    | guanylate cyclase activator 1a (retina) (predicted)                                     | <a href="#">AI716086</a>  | 4.00 |
| Mpp4                 | membrane protein, palmitoylated 4 (MAGUK p55 subfamily member 4)                        | <a href="#">NM_021265</a> | 4.00 |
| Hmgb2                | high mobility group box 2                                                               | <a href="#">NM_017187</a> | 4.00 |
| Mapk1                | mitogen activated protein kinase 1                                                      | <a href="#">BI282894</a>  | 4.00 |
| Lass4_predicted      | longevity assurance homolog 4 (S. cerevisiae) (predicted)                               | <a href="#">BE111727</a>  | 3.97 |
| Alpl                 | alkaline phosphatase, tissue-nonspecific                                                | <a href="#">Y00714</a>    | 3.97 |
| Eml1_predicted       | echinoderm microtubule associated protein like 1 (predicted)                            | <a href="#">BI289642</a>  | 3.94 |
| Ccnd2                | cyclin D2                                                                               | <a href="#">L09752</a>    | 3.94 |
| Bbs4_predicted       | Bardet-Biedl syndrome 4 (predicted)                                                     | <a href="#">AI502357</a>  | 3.91 |
| Zfp143_predicted     | zinc finger protein 143 (predicted)                                                     | <a href="#">AI170262</a>  | 3.91 |

|                      |                                                                                                 |                           |      |
|----------------------|-------------------------------------------------------------------------------------------------|---------------------------|------|
| Pkp2_predicted       | plakophilin 2 (predicted)                                                                       | <a href="#">BE113268</a>  | 3.89 |
| Mrpl14_predicted     | mitochondrial ribosomal protein L14 (predicted)                                                 | <a href="#">BE113348</a>  | 3.86 |
| Prom1                | prominin 1                                                                                      | <a href="#">NM_021751</a> | 3.86 |
| RGD1306405_predicted | similar to 1-acylglycerolphosphate acyltransferase-epsilon (predicted)                          | <a href="#">BF556812</a>  | 3.81 |
| Xpmc2h_predicted     | XPMC2 prevents mitotic catastrophe 2 homolog ( <i>Xenopus laevis</i> ) (predicted)              | <a href="#">AI237143</a>  | 3.81 |
| RGD1308111_predicted | similar to zinc finger protein Cezanne, cellular zinc finger anti-NF-kappaB Cezanne (predicted) | <a href="#">BF396260</a>  | 3.75 |
| Soc                  | socius                                                                                          | <a href="#">AA964950</a>  | 3.75 |
| Tnip2_predicted      | TNFAIP3 interacting protein 2 (predicted)                                                       | <a href="#">BF545192</a>  | 3.73 |
| Zbtb8_predicted      | zinc finger and BTB domain containing 8 (predicted)                                             | <a href="#">BF559709</a>  | 3.73 |
| Sag                  | retinal S-antigen                                                                               | <a href="#">AW529689</a>  | 3.70 |
| Osbp2_predicted      | oxysterol binding protein 2 (predicted)                                                         | <a href="#">AI112698</a>  | 3.70 |
| Zfp143_predicted     | zinc finger protein 143 (predicted)                                                             | <a href="#">BM383283</a>  | 3.70 |
| Slc17a7              | solute carrier family 17 (sodium-dependent inorganic phosphate cotransporter), member 7         | <a href="#">NM_053859</a> | 3.68 |
| Glrx2_predicted      | glutaredoxin 2 (thioltransferase) (predicted)                                                   | <a href="#">BG671304</a>  | 3.65 |
| Sgk                  | serum/glucocorticoid regulated kinase                                                           | <a href="#">NM_019232</a> | 3.63 |
| Ppp2r2b              | protein phosphatase 2 (formerly 2A), regulatory subunit B (PR 52), beta isoform                 | <a href="#">NM_022209</a> | 3.60 |
| Pacsin2              | protein kinase C and casein kinase substrate in neurons 2                                       | <a href="#">AI407930</a>  | 3.60 |
| Htr1f                | 5-hydroxytryptamine (serotonin) receptor 1F                                                     | <a href="#">NM_021857</a> | 3.58 |
| Scarb1               | scavenger receptor class B, member 1                                                            | <a href="#">AF071495</a>  | 3.58 |
| Mef2d                | myocyte enhancer factor 2D                                                                      | <a href="#">AW526160</a>  | 3.58 |
| Sellh                | Sell (suppressor of lin-12) 1 homolog ( <i>C. elegans</i> )                                     | <a href="#">BI285936</a>  | 3.55 |
| Kif3b_predicted      | kinesin family member 3B (predicted)                                                            | <a href="#">BI300933</a>  | 3.55 |
| Map4k3               | mitogen-activated protein kinase kinase kinase 3                                                | <a href="#">BG664160</a>  | 3.53 |
| Stard7_predicted     | START domain containing 7 (predicted)                                                           | <a href="#">BI282011</a>  | 3.50 |
| Col5a3               | collagen, type V, alpha 3                                                                       | <a href="#">NM_021760</a> | 3.50 |

|                      |                                                                                            |                           |      |
|----------------------|--------------------------------------------------------------------------------------------|---------------------------|------|
| Chsy1_predicted      | carbohydrate (chondroitin) synthase 1 (predicted)                                          | <a href="#">AI406533</a>  | 3.50 |
| Miox                 | myo-inositol oxygenase                                                                     | <a href="#">AF230096</a>  | 3.50 |
| Sellh                | Sell (suppressor of lin-12) 1 homolog (C. elegans)                                         | <a href="#">BF548909</a>  | 3.48 |
| Crocc_predicted      | ciliary rootlet coiled-coil, rootletin (predicted)                                         | <a href="#">BG372724</a>  | 3.48 |
| RGD1311530_predicted | similar to mucin 7, salivary (predicted)                                                   | <a href="#">BI285605</a>  | 3.48 |
| Tfpi2                | tissue factor pathway inhibitor 2                                                          | <a href="#">AI179507</a>  | 3.48 |
| Ric8b                | resistance to inhibitors of cholinesterase 8B (C. elegans)                                 | <a href="#">AI454929</a>  | 3.43 |
| RGD:708530           | cytochrome P450-like protein                                                               | <a href="#">AA818166</a>  | 3.43 |
| Drd4                 | dopamine receptor 4                                                                        | <a href="#">BI284462</a>  | 3.41 |
| Pacsin2              | protein kinase C and casein kinase substrate in neurons 2                                  | <a href="#">NM_130740</a> | 3.41 |
| Mta2_predicted       | metastasis-associated gene family, member 2 (predicted)                                    | <a href="#">BM386922</a>  | 3.41 |
| Arntl                | aryl hydrocarbon receptor nuclear translocator-like                                        | <a href="#">AB012600</a>  | 3.38 |
| Rbms2_predicted      | RNA binding motif, single stranded interacting protein 2 (predicted)                       | <a href="#">BG374052</a>  | 3.38 |
| Mlf1_predicted       | myeloid leukemia factor 1 (predicted)                                                      | <a href="#">BI302005</a>  | 3.36 |
| Pde8a                | phosphodiesterase 8A                                                                       | <a href="#">BG377379</a>  | 3.34 |
| Arih1_predicted      | ariadne ubiquitin-conjugating enzyme E2 binding protein homolog 1 (Drosophila) (predicted) | <a href="#">AI600108</a>  | 3.34 |
| Anp32e_predicted     | acidic (leucine-rich) nuclear phosphoprotein 32 family, member E (predicted)               | <a href="#">AI008642</a>  | 3.31 |
| Tulp1_predicted      | tubby like protein 1 (predicted)                                                           | <a href="#">AI601965</a>  | 3.31 |
| Ep300                | E1A binding protein p300                                                                   | <a href="#">BF403191</a>  | 3.29 |
| Slc29a1              | solute carrier family 29 (nucleoside transporters), member 1                               | <a href="#">NM_031684</a> | 3.28 |
| Fabp5                | fatty acid binding protein 5, epidermal                                                    | <a href="#">U13253</a>    | 3.27 |
| Madh4                | MAD homolog 4 (Drosophila)                                                                 | <a href="#">AB010954</a>  | 3.27 |
| RGD1310067_predicted | similar to E3 ubiquitin ligase SMURF2 (predicted)                                          | <a href="#">BF393807</a>  | 3.27 |
| C11orf8              | chromosome 11 open reading frame 8                                                         | <a href="#">AW536022</a>  | 3.23 |
| Jag1                 | jagged 1                                                                                   | <a href="#">NM_019147</a> | 3.23 |
| Pfkl                 | phosphofructokinase, liver, B-type                                                         | <a href="#">AI408151</a>  | 3.23 |

|                   |                                                                           |                           |       |
|-------------------|---------------------------------------------------------------------------|---------------------------|-------|
| Lamp3_predicted   | lysosomal-associated membrane protein 3 (predicted)                       | <a href="#">BF283924</a>  | 3.22  |
| Bbs2              | Bardet-Biedl syndrome 2 (human)                                           | <a href="#">NM_053618</a> | 3.20  |
| Slc16a1           | solute carrier family 16 (monocarboxylic acid transporters), member 1     | <a href="#">NM_012716</a> | 3.24  |
| Stard10_predicted | START domain containing 10 (predicted)                                    | <a href="#">AI104759</a>  | 3.20  |
| Optn              | optineurin                                                                | <a href="#">AB069907</a>  | 3.20  |
| Muc3              | mucin 3                                                                   | <a href="#">BI303846</a>  | 3.18  |
| Rax               | retina and anterior neural fold homeobox                                  | <a href="#">NM_053678</a> | 3.18  |
| Herc3_predicted   | hect domain and RLD 3 (predicted)                                         | <a href="#">AW524705</a>  | 3.18  |
| Dlc1              | deleted in liver cancer 1                                                 | <a href="#">AI176713</a>  | 3.16  |
| Glp2r             | glucagon-like peptide 2 receptor                                          | <a href="#">AI070395</a>  | 3.16  |
| Prph2             | peripherin 2                                                              | <a href="#">NM_013021</a> | 3.14  |
| RGD:1359117       | transmembrane protein vezatin                                             | <a href="#">AI235367</a>  | 3.14  |
| Ubtd1_predicted   | ubiquitin domain containing 1 (predicted)                                 | <a href="#">BI293253</a>  | 3.12  |
| Pcbp4_predicted   | poly(rC) binding protein 4 (predicted)                                    | <a href="#">BF562397</a>  | 3.12  |
| Mlst2_predicted   | male sterility domain containing 2 (predicted)                            | <a href="#">BM383809</a>  | 3.12  |
| Rhpn1_predicted   | rhophilin, Rho GTPase binding protein 1 (predicted)                       | <a href="#">BG378261</a>  | 3.09  |
| Gadd45b_predicted | growth arrest and DNA-damage-inducible 45 beta (predicted)                | <a href="#">BI287978</a>  | 3.09  |
| Catn11_predicted  | catenin alpha-like 1 (predicted)                                          | <a href="#">AI555457</a>  | 3.09  |
| Ppp3r1            | protein phosphatase 3, regulatory subunit B, alpha isoform, type 1        | <a href="#">NM_017309</a> | 3.09  |
| Atp1b2            | ATPase, Na <sup>+</sup> /K <sup>+</sup> transporting, beta 2 polypeptide  | <a href="#">U45946</a>    | 3.09  |
| Slc6a6            | solute carrier family 6 (neurotransmitter transporter, taurine), member 6 | <a href="#">NM_017206</a> | 3.074 |



**Supplementary Table S2: List of the genes that are up-regulated in WNIN-Ob rat retina**

| <b>Symbol</b>   | <b>Description</b>                                                    | <b>Genbank</b>            | <b>Fold Change</b> |
|-----------------|-----------------------------------------------------------------------|---------------------------|--------------------|
| Lgals3          | lectin, galactose binding, soluble 3                                  | <a href="#">NM_031832</a> | 6.27               |
| Porf1           | preoptic regulatory factor 1                                          | <a href="#">AI555295</a>  | 5.89               |
| Thbs2_predicted | thrombospondin 2 (predicted)                                          | <a href="#">AI406660</a>  | 4.23               |
| Ass             | arginosuccinate synthetase                                            | <a href="#">BF283456</a>  | 4.17               |
| Chi311          | chitinase 3-like 1                                                    | <a href="#">AA945643</a>  | 3.97               |
| Krt2-5          | keratin complex 2, basic, gene 5                                      | <a href="#">BI286411</a>  | 3.95               |
| Gfap            | glial fibrillary acidic protein                                       | <a href="#">NM_017009</a> | 3.89               |
| Ctss            | cathepsin S                                                           | <a href="#">NM_017320</a> | 3.73               |
| Grm6            | glutamate receptor, metabotropic 6                                    | <a href="#">D13963</a>    | 3.65               |
| Mpeg1           | macrophage expressed gene 1                                           | <a href="#">AI170394</a>  | 3.63               |
| RGD:1302937     | type I keratin KA13                                                   | <a href="#">BI280282</a>  | 3.51               |
| Anxa1           | annexin A1                                                            | <a href="#">NM_012904</a> | 3.46               |
| Serping1        | serine (or cysteine) peptidase inhibitor, clade G, member 1           | <a href="#">AW915763</a>  | 3.39               |
| RGD:1303044     | type I keratin KA15                                                   | <a href="#">BM385502</a>  | 3.25               |
| C1qa_predicted  | complement component 1, q subcomponent, alpha polypeptide (predicted) | <a href="#">BF418957</a>  | 3.22               |
| Cyp26a1         | cytochrome P450, family 26, subfamily A, polypeptide 1                | NM_130408                 | 3.20               |
| Cp              | ceruloplasmin                                                         | NM_012532                 | 3.07               |
